# Supplementary material for: TransRate: reference-free quality assessment of de novo transcriptome assemblies
Source: HighWire-hosted journal article supplement (doi:10.1101/gr.196469.115), 2016-06-01

**Supplemental Fig S5.** Example of the global optimisation method used to learn the automated contig score cut-off. Here, the optimal cut-off is the value that maximises the TransRate assembly score.

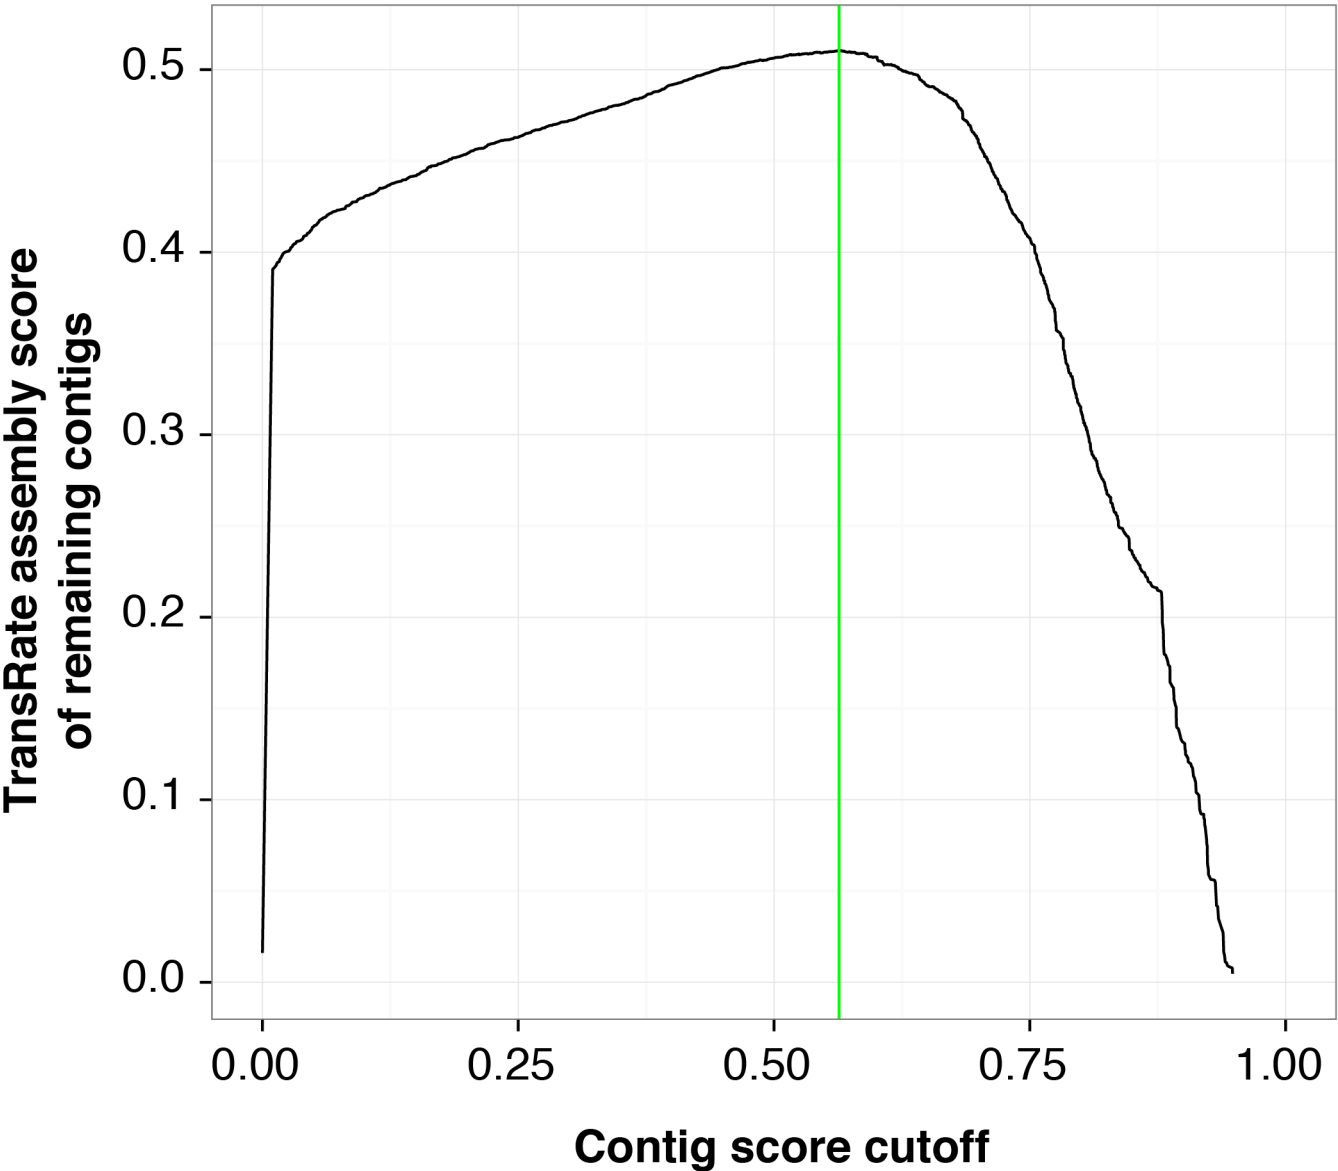

Supplement: Supplemental_Fig_S5.pdf [file Supplemental_Fig_S5.pdf]
