# Supplementary material for: TransRate: reference-free quality assessment of de novo transcriptome assemblies
Source: HighWire-hosted journal article supplement (doi:10.1101/gr.196469.115), 2016-06-01

**Supplemental Fig S6.** Examples of the effect of TransRate contig filtering on *de novo* transcriptome assemblies. **A)** Comparison of the number of genes that had full length or partial length matches in *de novo* assembled transcripts before and after TransRate filtering. **B)** Histogram of lengths of genes encompassed by the *de novo* assembled transcripts in A that were discarded by TransRate filtering. **C)** As in A, but for genes that had their entire length contained within a single contig.

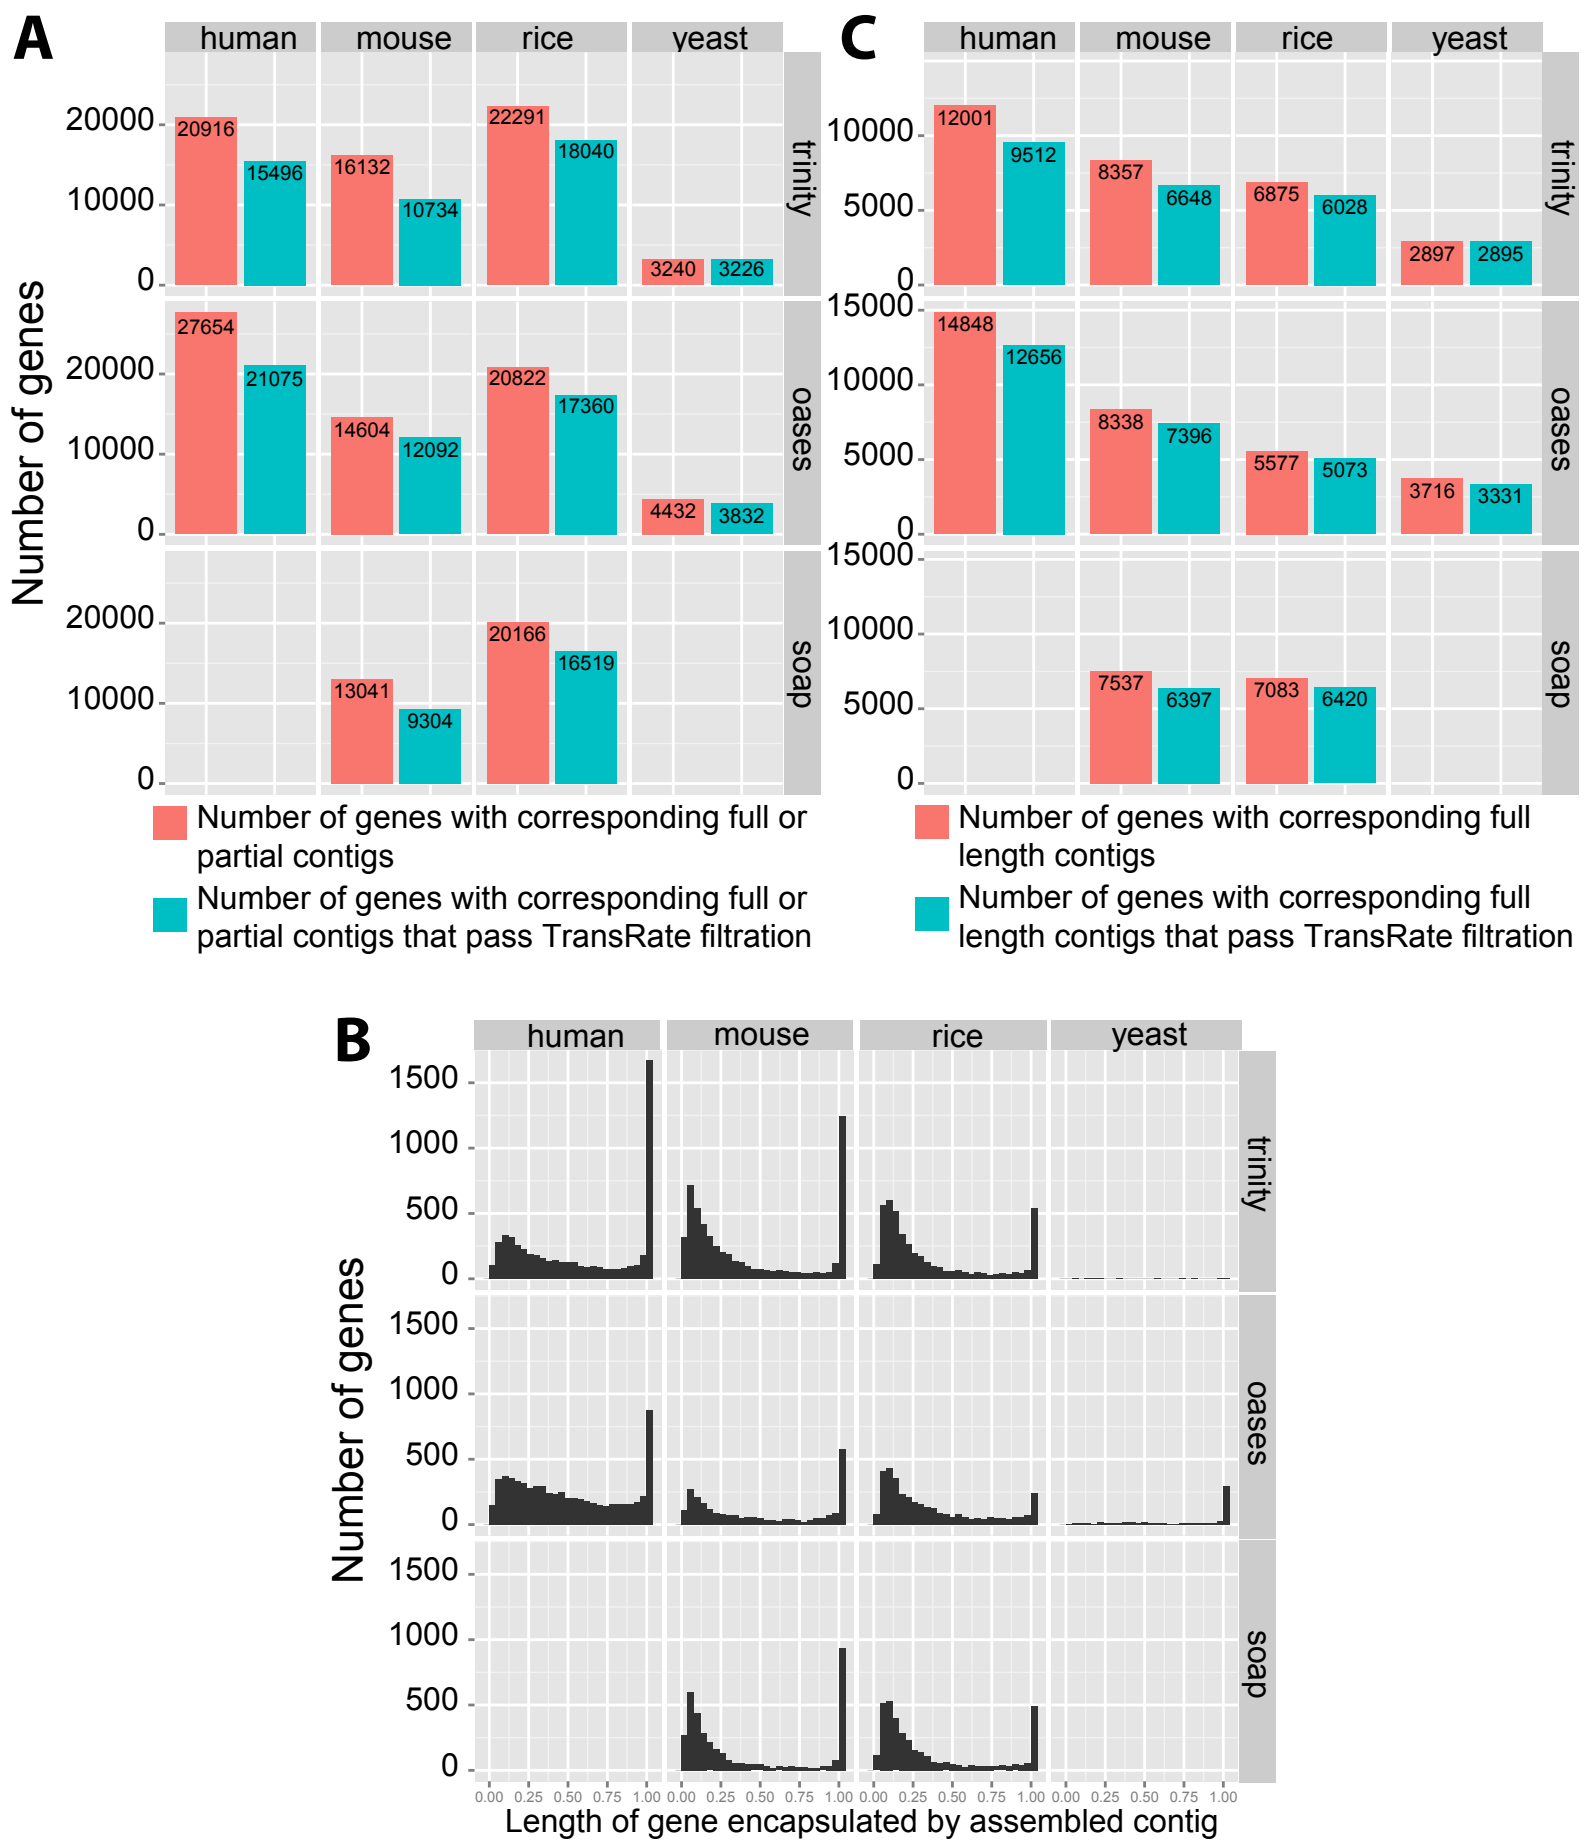

Supplement: Supplemental_Fig_S6.pdf [file Supplemental_Fig_S6.pdf]
