# Supplementary material for: TransRate: reference-free quality assessment of de novo transcriptome assemblies
Source: HighWire-hosted journal article supplement (doi:10.1101/gr.196469.115), 2016-06-01
Supplement: Supplemental_Table_S1.xlsx [file Supplemental_Table_S1.xlsx]

## Sheet: Supplemental_Table_S1
	Supplemental Table S1. Spearman’s rank correlation between the assembly F-score, the TransRate contig score, and the RSEM-eval contig impact score, for all contigs in simulated assemblies.
		TransRate contig score	contig_impact_score	assembly_accuracy
	TransRate contig score	1	0.39	0.71
	contig_impact_score	0.39	1	0.36
	assembly accuracy	0.71	0.36	1
