# Supplementary material for: TransRate: reference-free quality assessment of de novo transcriptome assemblies
Source: HighWire-hosted journal article supplement (doi:10.1101/gr.196469.115), 2016-06-01
Supplement: Supplemental_Table_S2.xlsx [file Supplemental_Table_S2.xlsx]

## Sheet: Supplemental_Table_S2
Supplemental Table S2. TransRate results and read analysis summary statistics for Transcriptome Shotgun Archive assemblies.
	code	score	optimal	cutoff	read_length	read_pairs	n_bases	tool	phylogeny	gc_content	mean_qual	deduped	coverage
1	GAAA	0.0842	0.1768	0.4868	101	105073488	72644207	trinity	Craniata	45	30.5044	46.9675	146.088
2	GAAC	0	0	0	75	13437058	23948363	soap	Embryophyta	47.5	32.0997	45.8466	42.0813
3	GABB	0.0917	0.1113	0.1675	101	54159060	22429870	newbler	Arthropoda	35	34.0859	40.4248	243.874
4	GABC	0.4074	0.5193	0.2579	101	48950755	55417641	oases	Craniata	51	35.8283	31.5368	89.2139
5	GABD	0.4067	0.5609	0.2803	101	43859704	56286855	oases	Craniata	50	35.8879	33.8234	78.701
6	GABE	0.4519	0.592	0.3003	101	28233932	64277642	oases	Craniata	48	35.9451	43.3728	44.3642
7	GABF	0.429	0.5847	0.3697	101	33282671	54004654	oases	Craniata	49	35.8854	37.6909	62.2456
8	GABH	0.184	0.2012	0.1508	121	34277230	51869800	oases	Embryophyta	53.5	31.7818	52.5922	79.9607
9	GABJ	0	0	0.1527	75	21655775	13930479	soap	Embryophyta	47	24.0567	66.8185	116.592
10	GABK	0.0852	0.0899	0.0309	100	37280334	7235553	newbler	Arthropoda	39	30.3572	35.3847	515.238
11	GABO	0.0774	0.1049	0.2628	90	13471065	21397566	soap	Embryophyta	46	35.8982	47.2649	56.6605
12	GABT	0.3433	0.3903	0.2272	90	27465703	42994243	trinity	Embryophyta	51	34.9584	33.9242	57.4941
13	GACB	0.3723	0.4283	0.2515	90	13246476	29702713	trinity	Embryophyta	48	34.9208	40.0075	40.1372
14	GACH	0.2243	0.3064	0.2621	90	33949278	71655603	trinity	Embryophyta	43	34.9526	46.3666	42.6406
15	GACN	0.3751	0.4616	0.2341	90	32780764	39745378	trinity	Embryophyta	47	35.4086	37.0394	74.2292
16	GACO	0.0891	0.0922	0.0204	100	37990584	9520930	newbler	Arthropoda	36	30.509	52.0938	399.022
17	GACP	0.1201	0.1514	0.2749	100	39269784	61161984	newbler	Arthropoda	40	30.8777	77.412	64.2062
18	GACU	0.1325	0.1369	0.0193	100	29060588	9092475	newbler	Arthropoda	40	29.9563	41.1461	319.611
19	GACV	0.1533	0.1572	0.0206	100	34449486	13992804	newbler	Arthropoda	34	31.6316	51.8717	246.194
20	GACW	0.1359	0.1537	0.1795	101	61407619	36498460	newbler	Arthropoda	39	33.7397	48.2437	169.93
21	GACX	0.1674	0.1736	0.0344	100	33960429	16693364	newbler	Arthropoda	34	32.5673	53.5904	203.437
22	GACY	0.1162	0.1711	0.246	100	106880588	33558976	newbler	Arthropoda	36	32.3639	59.0808	318.486
23	GACZ	0.1395	0.1437	0.0229	100	41936739	14878814	newbler	Arthropoda	38	31.5541	38.8057	281.855
24	GADA	0.0964	0.1012	0.1721	100	33837575	4805593	newbler	Arthropoda	37	30.8448	43.0582	704.129
25	GADB	0.0891	0.1033	0.1245	101	48290380	27545341	newbler	Arthropoda	39	33.3772	43.1595	177.065
26	GADC	0.235	0.2958	0.3517	90	26266668	43085194	soap	Embryophyta	44	35.0756	35.4624	54.868
27	GADD	0.3567	0.4797	0.0604	90	25761872	15859328	trinity	Bangiales	62	34.0229	20.1305	146.196
28	GADH	0.0764	0.0916	0.1659	101	54899583	28939054	newbler	Arthropoda	40	32.0415	50.3898	191.605
29	GADP	0.0276	0.0471	0.2313	61	17218726	7396551	abyss	Arthropoda	49	27.0147	55.903	142.004
30	GADQ	0.0688	0.1078	0.2483	61	12714517	10265613	abyss	Arthropoda	48	26.1439	69.228	75.5518
31	GADR	0.0522	0.061	0.2335	100	18386421	12343847	abyss	Arthropoda	47.5	29.783	49.8963	148.952
32	GADS	0.0669	0.0938	0.2832	61	18447100	9951217	abyss	Arthropoda	46.5	26.2599	63.1495	113.079
33	GADT	0.2942	0.3469	0.3384	76	31154141	73941518	trinity	Craniata	54.5	30.4941	60.0223	32.0215
34	GADU	0.0433	0.0646	0.1559	76	42876556	54059250	trinity	Craniata	53	19.6259	70.4555	60.2786
35	GADV	0.0568	0.2339	0.3403	76	30787786	64005252	trinity	Craniata	52	29.3605	54.3612	36.5575
36	GADW	0.1292	0.1335	0.0466	76	34991127	35074932	trinity	Craniata	54	23.7703	59.3735	75.8184
37	GADY	0.3056	0.3358	0.0301	76	31334511	71874973	trinity	Craniata	53.5	30.5416	58.8883	33.1329
38	GADZ	0.3407	0.3533	0.1203	76	29519766	41818907	trinity	Craniata	53	30.5005	58.3417	53.648
39	GAEA	0.3639	0.3982	0.2896	76	30647357	61569888	trinity	Craniata	54.5	30.6331	57.618	37.8302
40	GAEB	0.1407	0.1552	0.2064	76	21333132	27053936	trinity	Craniata	62	31.4827	50.292	59.9291
41	GAEJ	0.0397	0.0444	0.1936	100	28608906	13869744	abyss	Arthropoda	42.5	30.1198	42.2208	206.268
42	GAES	0.3019	0.3166	0.2482	76	16934726	38902006	trinity	Craniata	55	25.9254	53.614	33.0841
43	GAET	0.2357	0.2472	0.299	76	17076257	18977323	trinity	Craniata	56	25.2161	37.7774	68.3866
44	GAEU	0.3093	0.3344	0.0579	76	16605132	27061819	trinity	Craniata	57	25.2157	49.3518	46.6336
45	GAEV	0.2793	0.2877	0.0548	76	17565669	25742583	trinity	Craniata	54	26.123	46.3414	51.8592
46	GAEX	0.2073	0.2182	0.14	76	15774077	31014947	trinity	Craniata	56	25.5015	67.5357	38.6533
47	GAEY	0.089	0.0942	0.1233	76	20508404	10264930	trinity	Craniata	53	24.6025	71.9195	151.841
48	GAEZ	0.0522	0.1084	0.1191	76	17987014	19043704	trinity	Craniata	51.5	25.2748	76.5989	71.7829
49	GAFA	0.141	0.1461	0.0865	76	17987014	23435689	trinity	Craniata	51.5	25.2748	76.5989	58.3304
50	GAFB	0.3056	0.3479	0.3347	101	10831854	64498892	oases	Embryophyta	47.5	29.8954	72.129	16.9618
51	GAFS	0.0955	0.1881	0.2828	101	81763487	60229164	clc	Arthropoda	49	35.3079	36.132	137.112
52	GAFU	0.2693	0.3485	0.1857	76	17404667	12370265	trinity	Arthropoda	50	26.1908	62.2536	106.93
53	GAFV	0.1882	0.3023	0.3865	100	40308213	24892883	oases	Basidiomycota	55	33.6987	33.8121	161.927
54	GAFY	0.0539	0.1448	0.2772	101	148056148	31658703	clc	Arthropoda	48.5	34.3034	12.1536	472.34
55	GAGA	0.0037	0.0206	0.2616	104	52548024	118112028	abyss	Craniata	40.5	33.9823	43.6129	46.2696
56	GAGB	0.0027	0.0154	0.264	104	55048179	117549286	abyss	Craniata	40	34.5297	54.5808	48.7031
57	GAGE	0.1628	0.2451	0.2298	100	25329795	19760642	oases	Basidiomycota	55	34.5972	32.6999	128.183
58	GAGF	0.3755	0.4502	0.321	90	27165637	36334909	trinity	Arthropoda	37.5	37.0678	31.383	67.2881
59	GAGR	0.3043	0.4318	0.0539	101	41396586	25220627	oases	Eustigmatales	56	33.412	40.8088	165.779
60	GAGS	0.1353	0.3135	0.236	90	24976124	105479132	oases	Mollusca	44	35.1233	37.3857	21.3109
61	GAHK	0.3818	0.4553	0.1626	90	27556071	35684099	trinity	Embryophyta	42	36.4143	27.7399	69.5
62	GAHX	0.0171	0.0647	0.2902	108	46058354	7096622	trinity	unknown	35.5	32.8268	31.2724	700.939
63	GAID	0.1116	0.1488	0.3633	90	25204773	47794210	soap	Craniata	48	36.1402	40.5132	47.4624
64	GAIG	0.1063	0.1362	0.2794	90	6646768	22819884	soap	Embryophyta	44	34.4639	54.2637	26.2144
65	GAIP	0.085	0.1324	0.3181	75	26718722	27745556	soap	Embryophyta	45.5	32.3333	52.6504	72.2243
66	GAIT	0	0	0	107	33749667	79886600	abyss	Gonyaulacales	59	19.9771	89.8292	45.2043
67	GAIU	0	0	0	107	33749667	74185322	oases	Gonyaulacales	59	19.9771	89.8292	48.6783
68	GAIW	0.3819	0.4775	0.4898	100	37031980	41319897	trinity	Arthropoda	44	35.7171	32.0178	89.6226
69	GAJA	0.4653	0.4758	0.0596	100	32964915	30425812	trinity	Arthropoda	38	36.2611	39.1345	108.345
70	GAJC	0.3818	0.4177	0.1893	100	72472004	48051477	trinity	Arthropoda	40	36.1939	36.1175	150.822
71	GAJE	0.2074	0.2262	0.0135	100	66981516	55210528	oases	Embryophyta	51	34.8836	32.7882	121.32
72	GAJI	0.2279	0.2848	0.2319	131	15873275	40046333	trinity	Ascomycota	52.5	30.9114	51.2687	51.9248
73	GAJJ	0.4177	0.5372	0.3062	100	48366792	68753442	trinity	Craniata	51	34.0365	34.3377	70.3482
74	GAJS	0.0996	0.1685	0.3425	90	13677778	31118166	soap	Arthropoda	44	33.3204	92.1531	39.5589
75	GAKE	0.5149	0.5328	0.2425	100	187362730	41364074	clc	Embryophyta	46.5	34.926	19.7304	452.96
76	GAKG	0.1034	0.305	0.1898	101	31178116	27114579	trinity	Arthropoda	38	35.9854	22.4437	116.136
77	GALD	0.2553	0.3638	0.3219	90	26537763	53739700	trinity	Embryophyta	48	35.7492	47.6381	44.4438
78	GALE	0.2847	0.3774	0.1516	100	16473084	4511496	trinity	Spraguidae	42	35.2956	7.66559	365.136
79	GAMM	0.2194	0.2247	0.1245	51	18994903	22491424	trinity	Arthropoda	42.5	28.7093	76.4853	43.0715
80	GAMN	0.0109	0.011	0.01	101	88385689	29577771	trinity	Arthropoda	45	24.8734	65.0151	301.813
81	GAMP	0.317	0.555	0.4255	101	28797089	73712549	oases	Craniata	49	35.7082	54.0706	39.4574
82	GAMQ	0.3685	0.4686	0.0987	101	30371064	47899783	oases	Craniata	51	35.5913	35.3545	64.0395
83	GAMR	0.3508	0.5516	0.3704	101	30149908	71248613	oases	Craniata	49	35.639	51.6192	42.7396
84	GAMS	0.3341	0.4914	0.2453	101	29313937	71317563	oases	Craniata	50	35.6109	52.1105	41.5144
85	GAMT	0.3066	0.483	0.1748	101	31104392	62544363	oases	Craniata	51	35.4855	45.1389	50.229
86	GANE	0.0383	0.0938	0.2222	154	7012382	25972906	trinity	Embryophyta	43.5	34.3458	68.7257	41.5782
87	GANL	0.3898	0.4623	0.0527	90	27605467	11393618	trinity	Arthropoda	38.5	35.4331	13.5275	218.06
88	GANO	0.0987	0.1061	0.3281	101	47156814	8160158	soap	Arthropoda	33	36.4908	74.5077	583.67
89	GAOE	0.1039	0.1998	0.3126	100	37163977	77805078	trinity	Craniata	57.5	32.4156	43.895	47.7655
90	GAOT	0.2727	0.3785	0.2432	101	91218320	67617364	trinity	Embryophyta	49	36.0643	24.5035	136.253
91	GAPP	0.2956	0.3514	0.2255	90	13611432	20753900	trinity	Arthropoda	42	36.7281	37.6208	59.0264
92	GAPQ	0.2897	0.3302	0.3458	90	13391493	17216023	trinity	Arthropoda	41	36.913	33.3805	70.0065
93	GAQK	0.3839	0.4113	0.1236	100	44367596	85142357	trinity	Craniata	49	34.2944	39.6987	52.1099
94	GAQX	0.5237	0.5528	0.0931	100	12025522	54599464	oases	Arthropoda	44	35.3671	49.5212	22.025
95	GARA	0.1818	0.2212	0.3937	100	12880301	37766348	soap	Craniata	49.5	35.2475	47.171	34.1052
96	GARB	0.1794	0.3543	0.4041	101	13044847	28343611	trinity	Arthropoda	48	34.4638	46.0209	46.4842
97	GARC	0.1909	0.37	0.4091	101	12987929	24267454	trinity	Arthropoda	46.5	34.6984	35.974	54.0551
98	GARD	0.2243	0.274	0.3372	101	14506581	27655252	trinity	Arthropoda	45.5	32.9501	41.0577	52.9796
99	GARG	0.1911	0.337	0.3294	101	11327113	19077596	trinity	Arthropoda	47.5	34.7148	32.8245	59.9676
100	GARO	0.0213	0.1155	0.2998	100	42628006	19979737	clc	Arthropoda	38	36.7487	19.6754	213.356
101	GARW	0.0324	0.2184	0.297	100	83634701	36645141	clc	Arthropoda	43	36.3735	26.9142	228.229
102	GAUQ	0.18	0.3659	0.5793	80	29802194	104471671	trinity	Eleutherozoa	40	35.2742	55.3426	22.8213
103	GAUR	0.223	0.4124	0.5093	80	31923236	109864702	trinity	Eleutherozoa	42	35.162	48.5173	23.2455
104	GAUS	0.2116	0.3892	0.429	80	30844547	84908334	trinity	Eleutherozoa	42.5	35.4133	46.6734	29.0615
105	GAUT	0.2422	0.3842	0.4104	80	32493891	79427812	trinity	Eleutherozoa	47.5	34.8325	46.7533	32.728
106	GAUU	0.2452	0.3752	0.3689	100	33584666	87847280	trinity	Eleutherozoa	41	35.4537	36.0383	38.2307
107	GAVC	0.2429	0.4251	0.2208	100	41257296	143749784	trinity	Eleutherozoa	41	36.1606	40.1512	28.7008
108	GAVE	0.2026	0.3116	0.2736	100	36853037	115876093	trinity	Eleutherozoa	44	35.7492	44.8322	31.8038
109	GAVF	0.2317	0.3656	0.2359	100	41712544	89570263	trinity	Eleutherozoa	44	35.6141	28.1225	46.5696
110	GAVI	0.2114	0.3363	0.4371	100	38396211	102775721	trinity	Eleutherozoa	40	36.0179	34.4179	37.3592
111	GAVJ	0.3532	0.5737	0.6556	100	46848918	58736223	trinity	Eleutherozoa	35.5	35.7924	17.7121	79.7615
112	GAVK	0.2256	0.349	0.1741	100	35327953	97333895	trinity	Eleutherozoa	45.5	34.982	43.556	36.2956
113	GAVN	0.2921	0.3592	0.1022	100	34948776	25196017	trinity	Eleutherozoa	39.5	35.6987	10.1874	138.708
114	GAVO	0.3745	0.4727	0.4409	100	38224262	19920325	trinity	Eleutherozoa	40	35.7464	7.02678	191.886
115	GAVP	0.1815	0.2983	0.3898	100	38623931	127533390	trinity	Eleutherozoa	43	35.238	47.6681	30.2853
116	GAVQ	0.3125	0.4177	0.1718	100	33096844	74566677	trinity	Eleutherozoa	46	35.0975	34.3889	44.3856
117	GAVR	0.3041	0.4204	0.1947	100	43347434	80897012	trinity	Eleutherozoa	44	35.4006	24.082	53.5835
118	GAVS	0.3168	0.4794	0.4073	100	37028137	78717693	trinity	Eleutherozoa	41	35.7553	22.4728	47.0392
119	GAVZ	0.2932	0.3039	0.0312	100	33029817	47349970	trinity	Embryophyta	44	29.9244	60.7048	69.7568
120	GAWB	0.2175	0.3102	0.4425	80	34788204	85793471	trinity	Eleutherozoa	44	33.0515	51.7331	32.439
121	GAWF	0.1765	0.2616	0.2028	100	47511044	84643301	trinity	Arthropoda	46	30.627	31.5672	56.1309
122	GAWH	0.0938	0.0997	0.0201	100	466702474	63570677	cufflinks	Hydrozoa	43.5	34.6021	4.21484	734.147
123	GAWI	0.402	0.4451	0.0507	90	25748614	17917051	trinity	Arthropoda	38.5	36.2327	18.3365	129.339
124	GAXL	0.1958	0.4402	0.2679	100	14529464	128806345	trinity	Arthropoda	45	34.2773	52.9762	11.2801
125	GAXM	0.0002	0.0037	0.2365	100	14529464	70719115	trinity	Arthropoda	45	34.2773	52.9762	20.5453
126	GAXN	0.1635	0.4182	0.0471	100	18861014	150417084	trinity	Arthropoda	47	33.7353	47.8958	12.5391
127	GAXO	0.0012	0.0396	0.2397	100	13463088	84952495	trinity	Arthropoda	41	34.517	48.7869	15.8478
128	GAXP	0.3157	0.4569	0.3694	100	14493142	78574203	trinity	Arthropoda	41	34.3033	52.7897	18.4452
129	GAXQ	0.2348	0.4339	0.0383	100	16675940	97229504	trinity	Arthropoda	43	34.5713	43.7514	17.1511
130	GAXR	0.3326	0.4601	0.0278	100	13648445	70047731	trinity	Arthropoda	47	33.7833	41.1781	19.4845
131	GAXS	0.1993	0.434	0.0448	100	18098742	141418914	trinity	Arthropoda	46.5	33.8958	46.4567	12.798
132	GAXT	0.1277	0.4379	0.2671	100	14585832	205679920	trinity	Arthropoda	45	34.0278	52.495	7.09152
133	GAXU	0.3232	0.4309	0.075	100	53921012	61897451	oases	Embryophyta	42.5	36.3474	37.9853	87.1135
134	GAZO	0.3455	0.4544	0.4166	80	23401700	52918411	trinity	Pelmatozoa	40	35.3515	46.7044	35.3778
135	GAZP	0.2495	0.3248	0.2826	80	17548074	30127071	trinity	Eleutherozoa	44	35.641	37.7884	46.5975
136	GAZR	0.0533	0.2647	0.1827	90	39976010	11707463	oases	Arthropoda	41	34.6833	7.55164	307.312
137	GAZU	0.2726	0.4569	0.3866	100	13463088	77598286	trinity	Arthropoda	41	34.517	48.7869	17.3497
138	GAZY	0.1556	0.3257	0.364	100	66632235	252251665	trinity	Craniata	48	35.5677	55.3376	26.415
139	GBAA	0.1461	0.3331	0.2721	100	64756635	255113553	trinity	Craniata	48	35.8041	54.4637	25.3835
140	GBBN	0	0	0	68	58950238	18851137	clc	Arthropoda	57	33.0665	30.0928	212.646
141	GBDO	0.3113	0.3659	0.0587	101	25980956	79299319	oases	Arthropoda	34.5	36.7343	41.7243	33.0908
142	GBDP	0.3544	0.4256	0.1465	101	26224026	92361614	oases	Arthropoda	33.5	36.7858	46.6721	28.6767
143	GBDY	0.3508	0.3794	0.0551	101	26687609	53782308	oases	Arthropoda	35	36.7822	37.678	50.1178
144	GBEF	0.456	0.5188	0.2032	72	15581244	40642033	trinity	Embryophyta	44	34.5198	59.2408	27.6032
145	GBEG	0.3583	0.4458	0.239	72	27442045	49495750	trinity	Embryophyta	44	30.3718	73.7925	39.9191
146	GBEO	0.3697	0.4201	0.1593	90	25803182	21959904	trinity	Arthropoda	51	34.4414	16.9699	105.751
147	GBEP	0.0574	0.0694	0.1671	101	134372556	34745250	oases	Embryophyta	48.5	32.8615	41.1649	390.604
148	GBEQ	0.04	0.0488	0.1669	101	172720474	34081017	oases	Embryophyta	48	32.404	46.9422	511.862
149	GBEZ	0.4554	0.4841	0.4111	50	36011081	40853887	abyss	Prasinophyceae	56	36.966	40.0299	44.073
150	GBFL	0.0335	0.0716	0.2383	101	31800150	33379313	clc	Embryophyta	45.5	33.9215	49.7613	96.2217
151	GBFP	0.3542	0.4388	0.3479	101	48907974	136502473	trinity	unknown	63	33.6813	61.6757	36.1877
152	GBFZ	0.3548	0.4174	0.3185	101	42207932	129634825	trinity	unknown	62	33.1007	69.9011	32.8847
153	GBHJ	0.3631	0.4208	0.1677	72	45601497	119120515	oases	Embryophyta	42	33.3179	66.6775	27.5629
154	GBIR	0.3438	0.424	0.5077	50	16206929	26958481	soap	Embryophyta	45	37.2049	58.9632	30.0591
155	GBIS	0.361	0.4336	0.5031	50	16774125	24175988	soap	Embryophyta	47	36.8985	47.6934	34.6917
