# Supplementary figures and images for: TransRate: reference-free quality assessment of de novo transcriptome assemblies
Source: HighWire-hosted journal article supplement (doi:10.1101/gr.196469.115), 2016-06-01

**Supplemental Fig S3.** Analysis of  $s(C_{seg})$  scores for artificially fused transcripts.

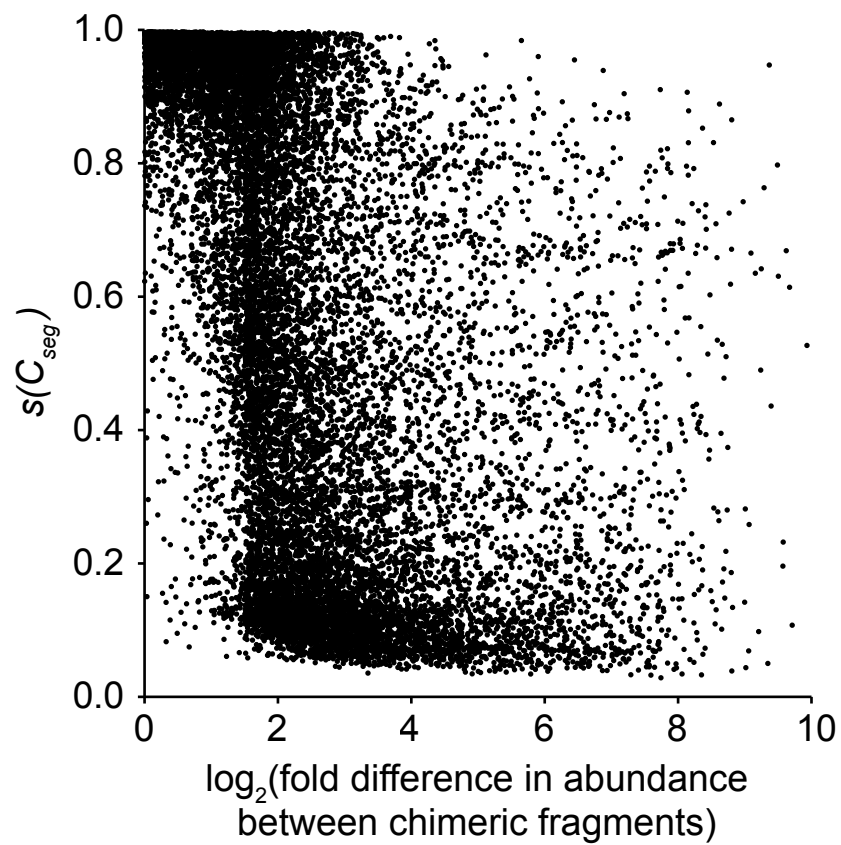

Supplement: Supplemental_Fig_S3.pdf [file Supplemental_Fig_S3.pdf]
